# Supplementary material for: Injectable hydrogels for bone regeneration with tunable degradability via peptide chirality modification
Source: Royal Society of Chemistry journal article supplement (doi:10.1039/d4mh00398e), 2024-01-01
Supplement: d4mh00398e1.pdf [file d4mh00398e1.pdf]

## Supporting Information

### Injectable Hydrogels for Bone Regeneration with Tunable Degradability via Peptide Chirality Modification

Weikai Chen,<sup>†abcde</sup> Shihao Sheng,<sup>†f</sup> Kai Tan,<sup>†de</sup> Sicheng Wang,<sup>†abch</sup> Xiang Wu,<sup>abc</sup> Jiayi Yang,<sup>g</sup> Yan Hu,<sup>f</sup> Liehu Cao,<sup>j</sup> Ke Xu,<sup>abc</sup> Fengjin Zhou,<sup>\*i</sup> Jiacan Su,<sup>\*abcf</sup> Qin Zhang,<sup>\*abc</sup> and Lei Yang<sup>\*de</sup>

<sup>a</sup> Institute of Translational Medicine, Shanghai University, Shanghai 200444, P. R. China

<sup>b</sup> Organoid Research Center, Shanghai University, Shanghai 200444, P. R. China.

<sup>c</sup> National Center for Translational Medicine (Shanghai) SHU Branch, Shanghai University, Shanghai 200444, P. R. China.

<sup>d</sup> Department of Orthopedics, The Second Affiliated Hospital and Yuying Children's Hospital of Wenzhou Medical University, Wenzhou, Zhejiang 325003, P. R. China.

<sup>e</sup> Key Laboratory of Orthopedics of Zhejiang Province, Wenzhou, Zhejiang 325035, P. R. China.

<sup>f</sup> Department of Orthopedics, Xinhua Hospital, Shanghai Jiao Tong University School of Medicine, Shanghai 200092, P. R. China.

<sup>g</sup> Department of Gynaecology, The Second Affiliated Hospital and Yuying Children's Hospital of Wenzhou Medical University, Wenzhou, Zhejiang 325003, P. R. China.

<sup>h</sup> Department of Orthopedics, Shanghai Zhongye Hospital, Shanghai 200941, P. R. China

<sup>i</sup> Honghui Hospital, Xi'an Jiao Tong University, Xi'an 710000, P. R. China.

<sup>j</sup> Department of Orthopedics, Shanghai Luodian Hospital, Shanghai 201908, P. R. China.

\*Address correspondence to: dr.zhoufj@163.com (F.Z.), drsujiacan@163.com (J. S.), sabrina\_1985@shu.edu.cn (Q. Z.), yanglei@wmu.edu.cn (L. Y.)

<sup>†</sup>These authors contributed equally to this work.

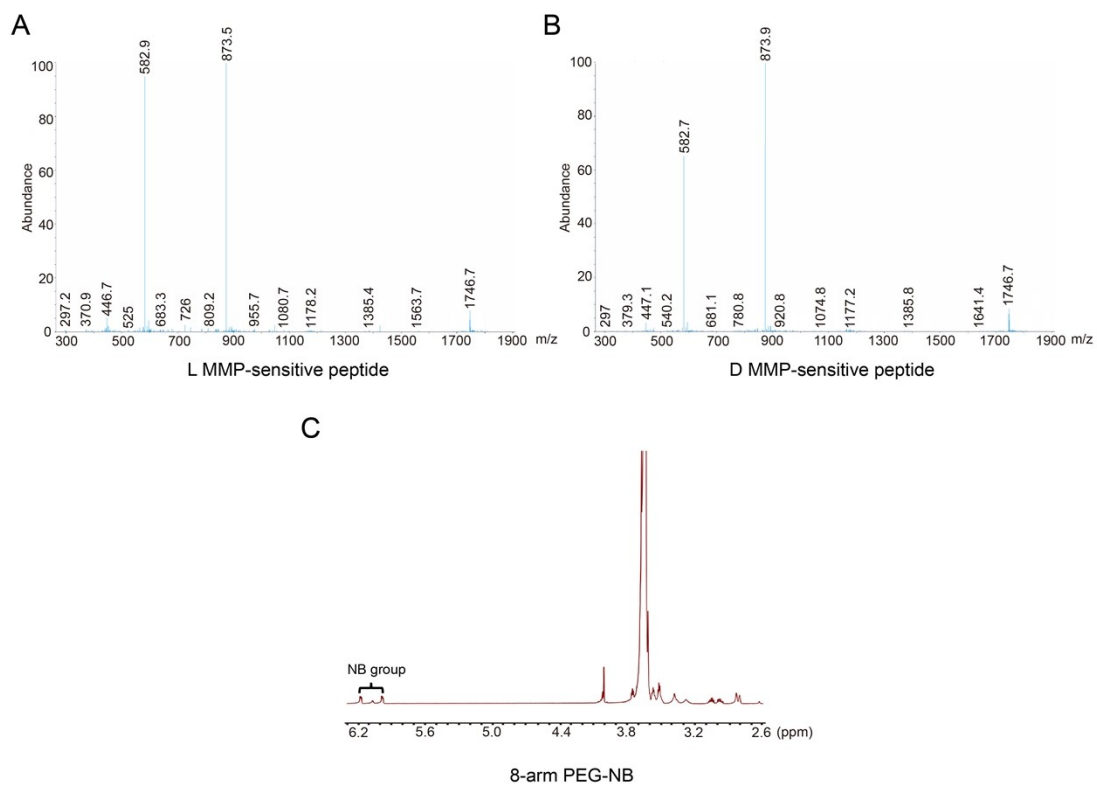

**Fig. S1** (A) and (B) The mass spectra result of L and D MMP-sensitive peptides. (C) <sup>1</sup>H-NMR spectrum of 8-arm PEG-NB.

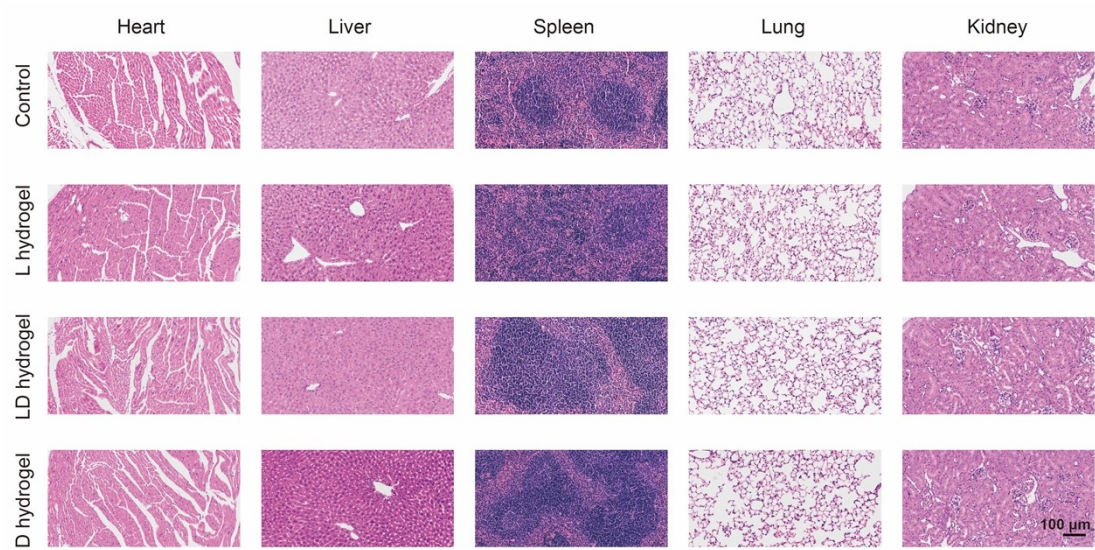

**Fig. S2** Histology of major organs (heart, liver, spleen, lung, and kidney) after 12-week hydrogels implantation in vivo.

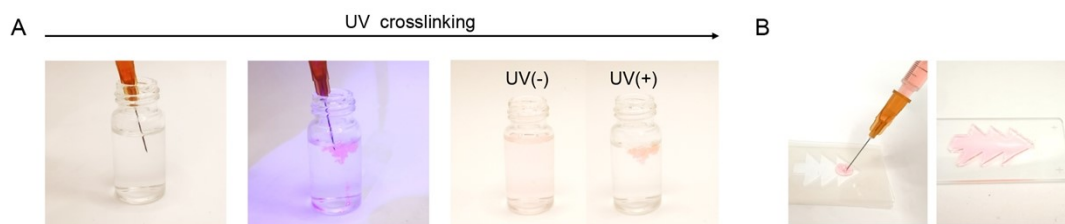

**Fig. S3** (A) Photographs of the solution before and after hydrogel transition by UV irradiation. (B) Demonstration of the hydrogel's injectability and plasticity.
